# Supplementary material
Source: publisher figshare collection journal article supplement (https://acs.figshare.com/ndownloader/files/3753058)
Supplement: Supplementary file 1 [file 3753058]

In main manuscript following equation is presented to determine the total number of cuts generated to eliminate the current changeover sequence given by ordered set  $Seq$  for multipurpose blend unit.

$$\text{Integer cuts generated} = J_o + \sum_{x=1}^X G_x J_x$$

Where,  $r = |Seq|$  and  $X = n^{BSP} - 1 - r$ . To determine total number of cuts, we define the situation as occupancy problem of distributing distinguishable tasks belonging to set  $Seq$  into  $X$  distinguishable even-points. In particular, we consider a special distribution where order of placement matters to maintain the current task changeover sequence.

$$J_o = \frac{C(n^{BSP} - 1, \pi_1, \pi_2, \dots, \pi_r)}{r!} = \frac{(n^{BSP} - 1)(n^{BSP} - 2) \dots (n^{BSP} - r)}{r!}$$

Parameter  $J_o$  denotes number of feasible task assignments that can generate the current changeover sequence, where each task in ordered set  $Seq$  is performed only once. The last event point has no production taking place because we restrict solution space of BSP by fixing allocation variable  $wv_{i,j,N} = 0$  as stated in section 4.1.

Moreover, the assignment sequence can be maintained even if a particular blending a task  $i \in Seq$  or multiple tasks are repeated total of  $x$  number of times. Equivalent to the parameter  $J_o$ , a parameter  $J_x$  calculates how many assignment will generate current task sequence order and also repeat certain tasks. This, means assigning  $(r + x)$  tasks to an event-point set  $\{1, 2, \dots, n^{BSP} - 1\}$ .

$$J_x = \frac{C(n^{BSP} - 1, \pi_1, \pi_2, \dots, \pi_{r+x})}{(r+x)!} = \frac{(n^{BSP} - 1)(n^{BSP} - 2) \dots (n^{BSP} - r - x)}{(r+x)!}$$

Here,  $\pi_w = 1, \forall w \in \{1, 2, \dots, n^{BSP}\}$ . There are multiple ways of selecting which blending a task  $i \in Seq$  or multiple tasks can be repeated total of  $x$  number of times. We provide formulation for parameter  $G_x$  to calculate for repetitions up to  $x = 6$ .

$$G_{x=1} = C(r, 1)$$

$$G_{x=2} = C(r, 1) + \frac{C(r, 1, 1)}{2!}$$

$$G_{x=3} = C(r, 1) + 2 \frac{C(r, 1, 1)}{2!} + \frac{C(r, 1, 1, 1)}{3!}$$

$$G_{x=4} = C(r, 1) + 3 \frac{C(r, 1, 1)}{2!} + 3 \frac{C(r, 1, 1, 1)}{3!} + \frac{C(r, 1, 1, 1, 1)}{4!}$$

$$G_{x=5} = C(r, 1) + 4 \frac{C(r, 1, 1)}{2!} + 6 \frac{C(r, 1, 1, 1)}{3!} + 4 \frac{C(r, 1, 1, 1, 1)}{4!} + \frac{C(r, 1, 1, 1, 1, 1)}{5!}$$

$$G_{x=6} = C(r, 1) + 5 \frac{C(r, 1, 1)}{2!} + 10 \frac{C(r, 1, 1, 1)}{3!} + 10 \frac{C(r, 1, 1, 1, 1)}{4!} + 5 \frac{C(r, 1, 1, 1, 1, 1)}{5!} + \frac{C(r, 1, 1, 1, 1, 1, 1)}{6!}$$

If only one task  $i \in Seq$  is selected to repeat  $x$  number of times, then there are  $\frac{r!}{1!(r-1)!}$  options.

If two different tasks are selected and each task is to repeat one time, then there are  $\frac{C(r, 1, 1)}{2!}$  options to

choose two tasks from set  $Seq$ . If tasks are to be repeated 3 times, then  $G_{x=3}$  states different ways that can be done. The first term in  $G_{x=3}$  states that we can either choose only one task to repeat 3 times, second term considers that we can choose two different tasks and repeat the first task 2 times and the second task 1 time or repeat the first task 1 time and the second task 2 times. The last term in  $G_{x=3}$  considers selecting three different tasks to repeat only 1 time. Similarly, if tasks are repeated 4 times total, then we can select either one task to repeat 4 times or choose four different tasks to repeat each task only once. The second term in  $G_{x=4}$  considers how many ways two different tasks can be chosen and these two chosen tasks can

be repeated total of four number of times in 3 different ways. Of these two chosen tasks, the first task can be repeated 3 times and the second only 1 time or the first can be repeated 2 times and the second also 2 times or the first one repeated only 1 time and the second one 3 times. The third term in  $G_{x=4}$  calculates number of ways three different tasks are chosen from set  $Seq$  and these three chosen tasks can be selected to repeat multiple times in 3 different ways: (1) the first task repeats 2 times, the second task 1 time, and the third task 1 time, (2) the first task repeats 1 time, the second task 2 times, and the third task 1 time, (3) the first task repeats 1 time, the second task 1 time, and the third task 2 times.

We have provided formulation for calculating  $G_x$  for only up to 6 total tasks repetitions, however, if needed reader can derive the formulation for higher number repetitions as necessary.
